# Supplementary material for: Further improvement of wet process treatments in GEOS-Chem v12.6.0: impact on global distributions of aerosols and aerosol precursors
Source: Copernicus journal article supplement (doi:10.5194/gmd-13-2879-2020), 2020-06-30
Supplement: Supplementary file 1 [file gmd-13-2879-2020-supplement.pdf]

Supplement of Atmos. Chem. Phys., 20, 7575–7594, 2020  
<https://doi.org/10.5194/acp-20-7575-2020-supplement>  
© Author(s) 2020. This work is distributed under  
the Creative Commons Attribution 4.0 License.

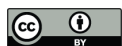

*Supplement of*

## **Synergistic enhancement of urban haze by nitrate uptake into transported hygroscopic particles in the Asian continental outflow**

**Jihoon Seo et al.**

*Correspondence to:* Jin Young Kim (jykim@kist.re.kr)

The copyright of individual parts of the supplement might differ from the CC BY 4.0 License.

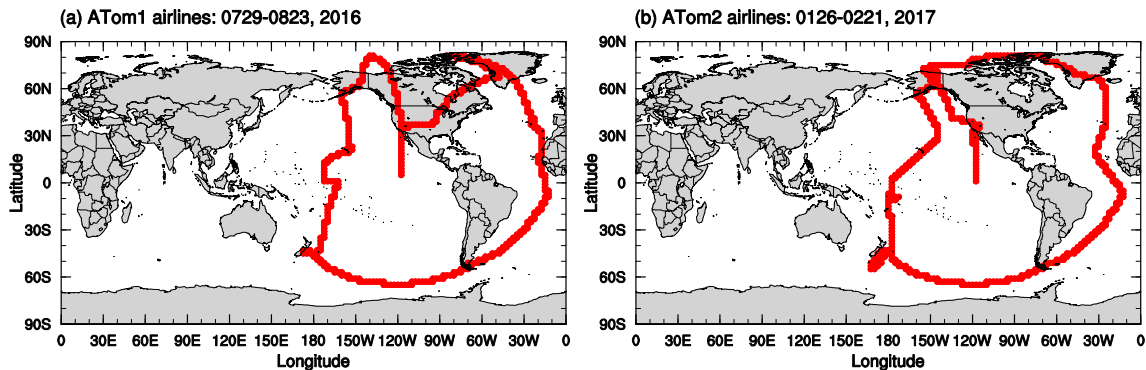

Figure S1. The flight tracks of (a) ATom-1 and (b) ATom-2.

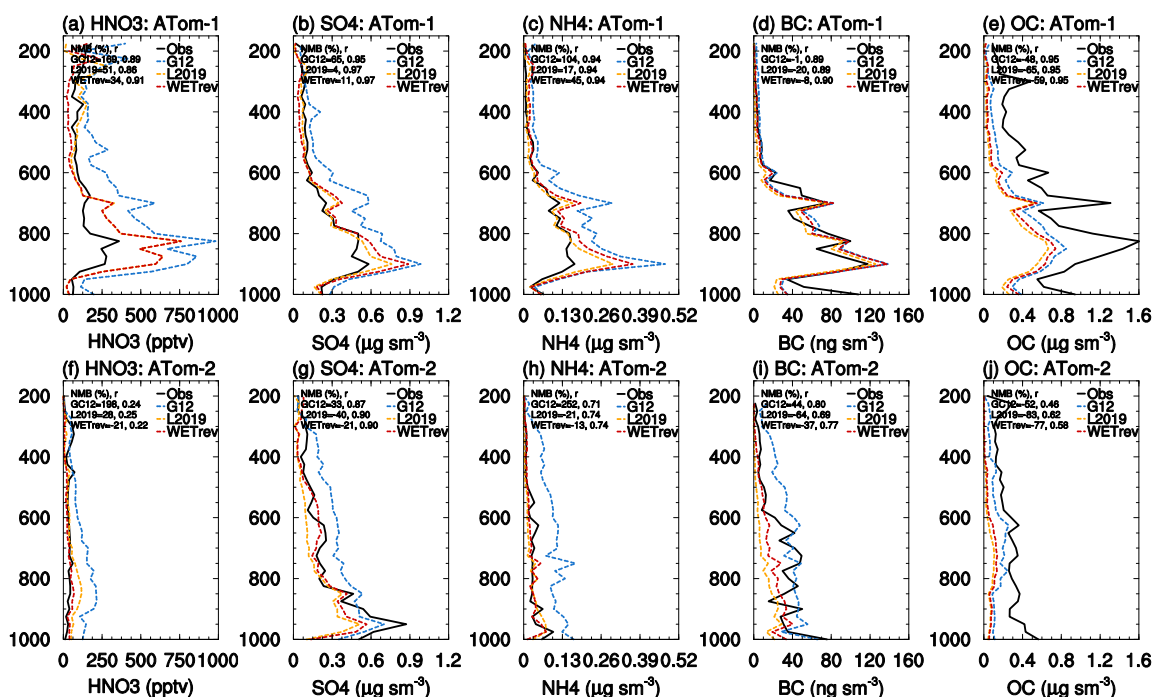

Figure S2. Vertical profiles of nitric acid, sulfate, ammonium, black carbon, and organic carbon from ATom aircraft observations (black, ATom-1: a-e; ATom-2: f-j) and GEOS-Chem simulations by GC12 (blue), L2019 (yellow) and WETrev (red) cases over the land.
